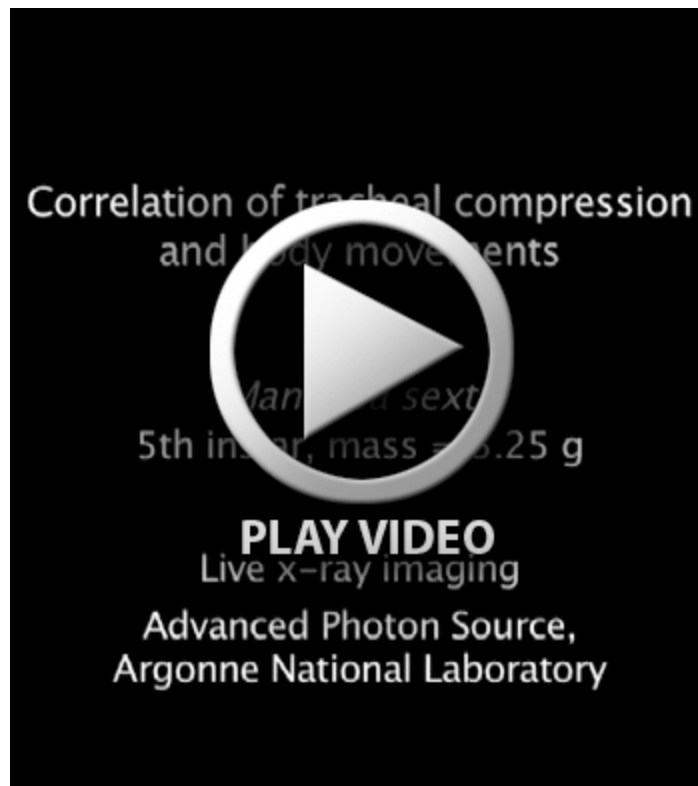

**Movie 1.** This movie shows the synchronization between the external body movements and the tracheal compressions during hypoxia in a fifth instar caterpillar. The top panel shows the light video we recorded, and the bottom panel shows the X-ray video taken at the same time.

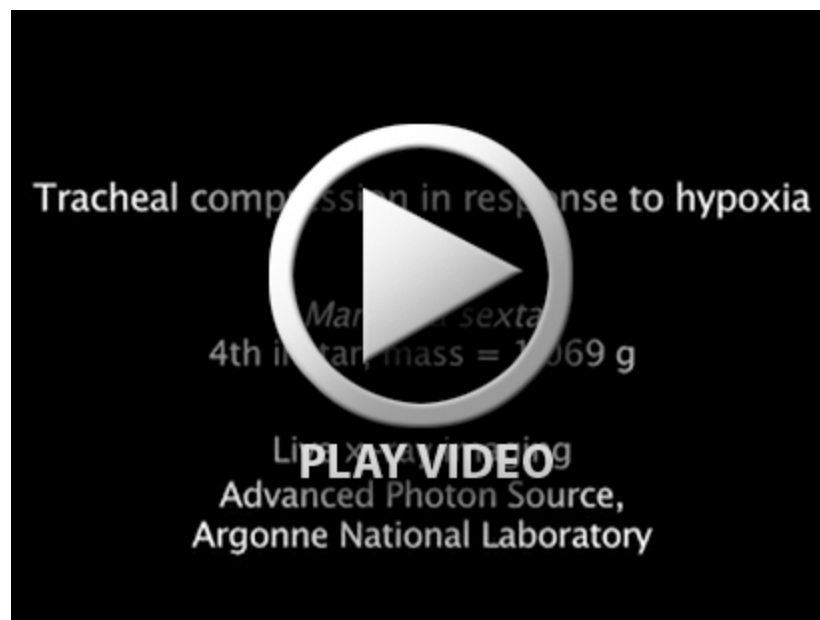

**Movie 2.** This X-ray video shows tracheal movements in normoxia and hypoxia in a fourth instar caterpillar.
